# Supplementary material for: A series of coordination polymers based on a new 2′,5′-dimethyl-1,1′:4′,1′′-terphenyl-3,3′′-dicarboxylic acid ligand: structures, luminescence, and magnetic properties
Source: Royal Society of Chemistry journal article supplement (doi:10.1039/c3ce41971a), 2013-11-07
Supplement: c3ce41971a.pdf [file c3ce41971a.pdf]

## Electronic Supporting Information

### A series of coordination polymers based on a new 2', 5'-dimethyl-1, 1' : 4', 1''-terphenyl-3, 3''-dicarboxylic acid ligand: structures, luminescence, and magnetic properties

Zhe Wu,<sup>a</sup> Wujuan Sun,<sup>a</sup> Ying Chai,<sup>a</sup> Wenjie Zhao,<sup>b</sup> He Wu,<sup>a</sup> Ting Shi<sup>a</sup> and Xuwu Yang\*<sup>a</sup>

<sup>a</sup> Key Laboratory of Synthetic and Natural Functional Molecule Chemistry of Ministry of Education, Shaanxi Key Laboratory of Physico-Inorganic Chemistry, College of Chemistry & Materials Science, Northwest University, Xi'an 710069, P. R. China. E-mail: yangxuwu@nwu.edu.cn.

<sup>b</sup> Department of Biochemical Engineering, Xianyang Vocational Technical college, Xianyang, 712000, P. R. China.

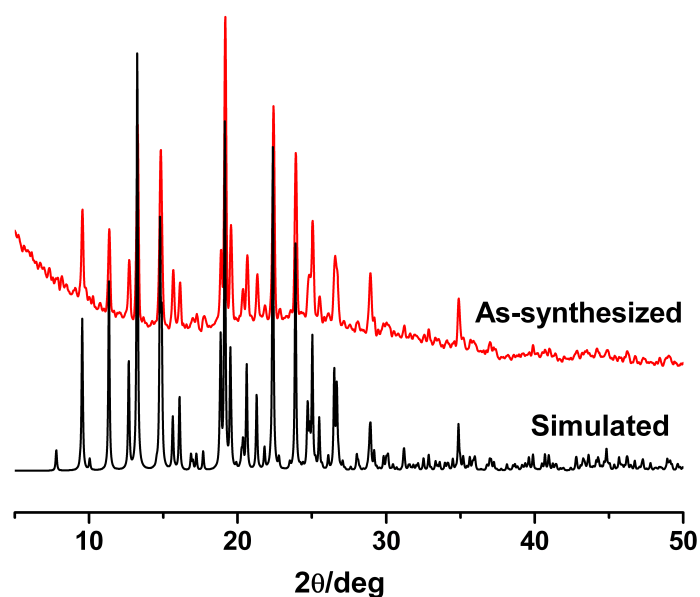

Fig. S1 PXRD of Complex 1.

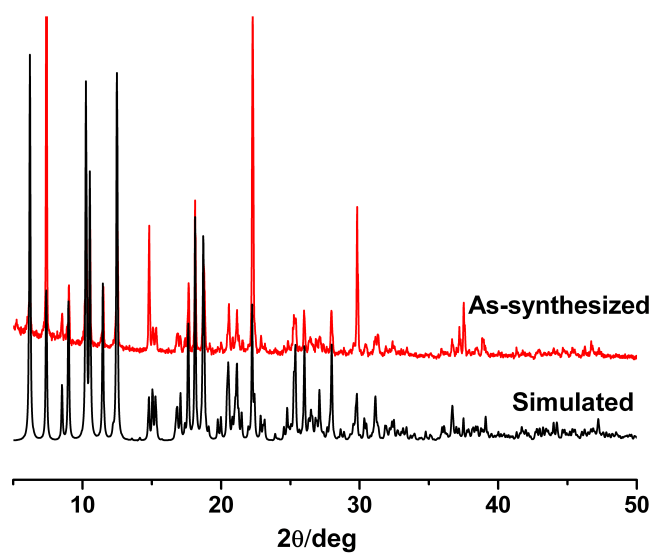

**Fig. S2** PXRD of Complex 2.

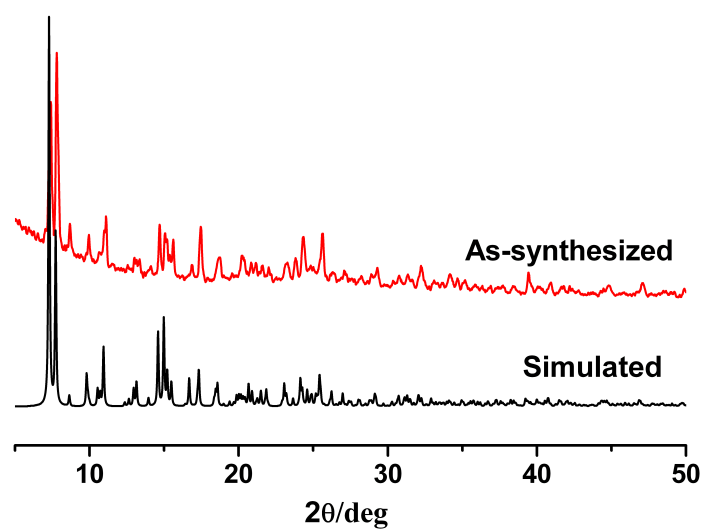

**Fig. S3** PXRD of Complex 3.

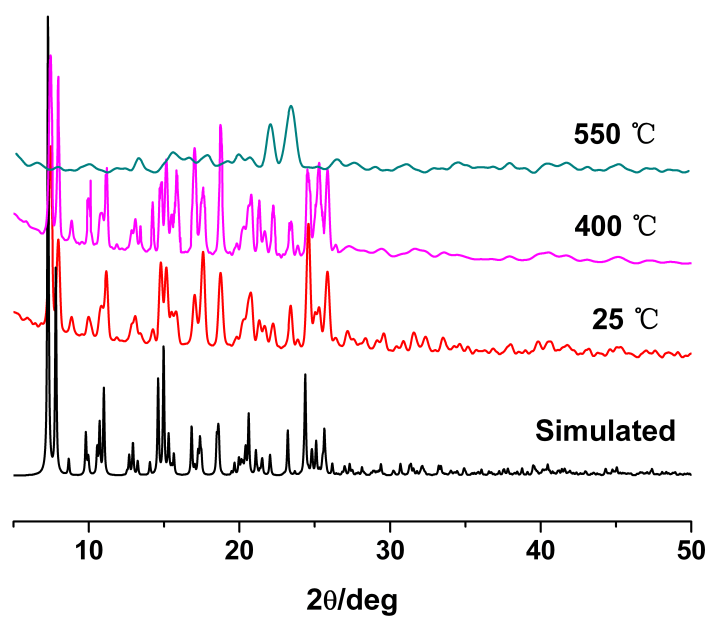

Fig. S4 Temperature-dependence PXR D patterns for Complex 4.

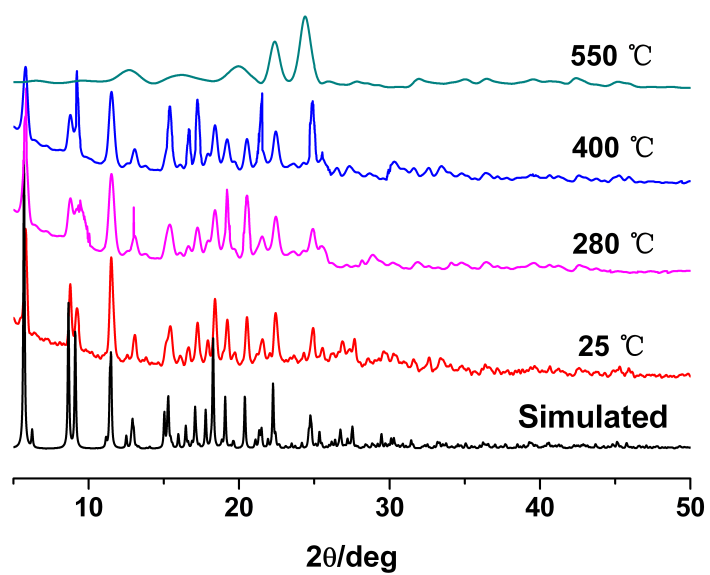

Fig. S5 Temperature-dependence PXR D patterns for Complex 5.

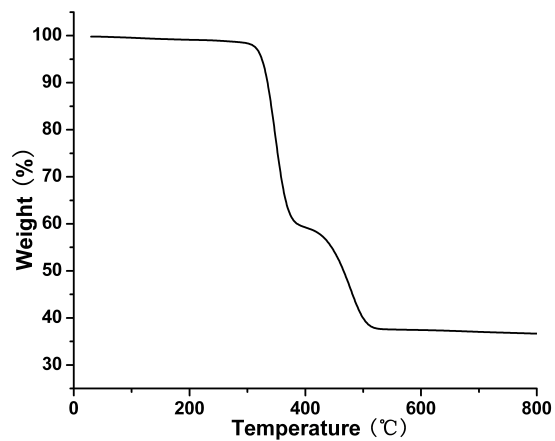

**Fig. S6** TGA plot for Complex 1.

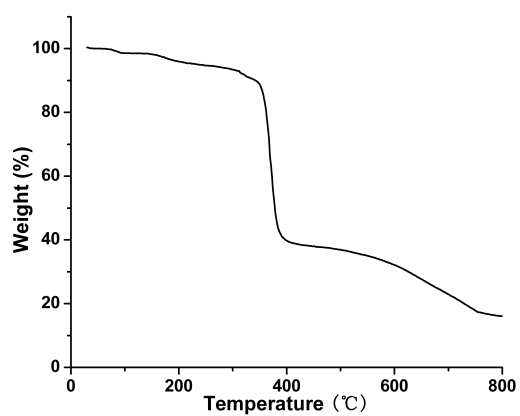

**Fig. S7** TGA plot for Complex 2.

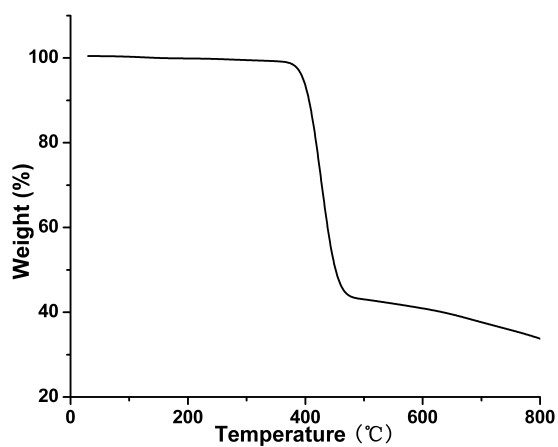

**Fig. S8** TGA plot for Complex 3.

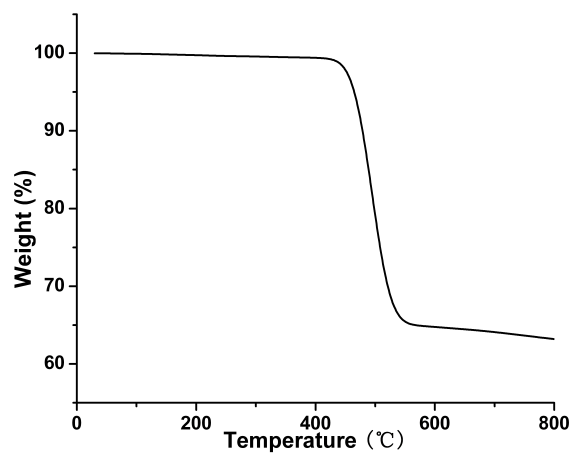

**Fig. S9** TGA plot for Complex 4.

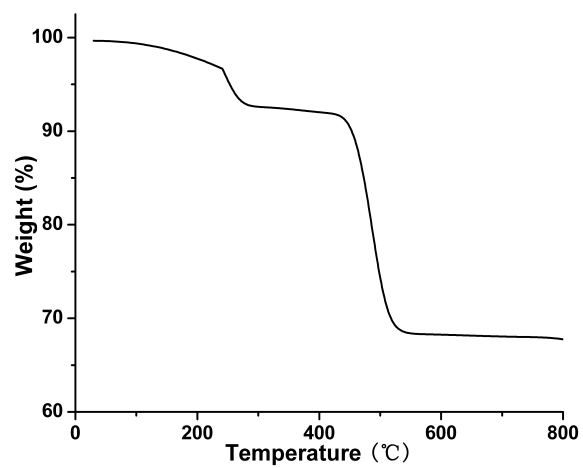

**Fig. S10** TGA plot for Complex 5.

Table S1. Selected bond lengths (Å) and angles (deg) for **1-5**<sup>4</sup>

| <b>Complex 1</b>    |            |                     |            |
|---------------------|------------|---------------------|------------|
| Mn(1)-O(1)          | 2.134(5)   | Mn(1)-O(3)          | 2.142(5)   |
| Mn(1)-N(4)          | 2.242(8)   | Mn(1)-N(7)          | 2.243(7)   |
| Mn(1)-N(8)          | 2.275(7)   | Mn(1)-N(1)          | 2.303(8)   |
| O(1)-Mn(1)-O(3)     | 176.9(2)   | O(1)-Mn(1)-N(4)     | 95.6(2)    |
| O(3)-Mn(1)-N(4)     | 87.2(2)    | O(1)-Mn(1)-N(7)     | 90.2(2)    |
| O(3)-Mn(1)-N(7)     | 88.3(2)    | N(4)-Mn(1)-N(7)     | 91.7(3)    |
| O(1)-Mn(1)-N(8)     | 88.5(2)    | O(3)-Mn(1)-N(8)     | 92.9(2)    |
| N(4)-Mn(1)-N(8)     | 90.7(3)    | N(7)-Mn(1)-N(8)     | 177.4(3)   |
| O(1)-Mn(1)-N(1)     | 88.0(3)    | O(3)-Mn(1)-N(1)     | 89.3(3)    |
| N(4)-Mn(1)-N(1)     | 175.5(3)   | N(7)-Mn(1)-N(1)     | 91.1(3)    |
| N(8)-Mn(1)-N(1)     | 86.6(3)    |                     |            |
| <b>Complex 2</b>    |            |                     |            |
| Cd(1)-N(1)          | 2.303(5)   | Cd(1)-N(3)          | 2.292(5)   |
| Cd(1)-O(1)          | 2.304(4)   | Cd(1)-O(4)#1        | 2.370(3)   |
| Cd(1)-O(3)          | 2.419(4)   | Cd(1)-O(3)#1        | 2.478(4)   |
| Cd(1)-O(2)          | 2.541(4)   | N(1)-Cd(1)-N(3)     | 166.88(17) |
| N(1)-Cd(1)-O(1)     | 86.21(16)  | N(3)-Cd(1)-O(1)     | 83.39(16)  |
| N(1)-Cd(1)-O(4)#1   | 104.47(16) | N(3)-Cd(1)-O(4)#1   | 88.64(16)  |
| O(1)-Cd(1)-O(4)#1   | 138.37(15) | N(1)-Cd(1)-O(3)     | 89.06(16)  |
| N(3)-Cd(1)-O(3)     | 84.06(15)  | O(1)-Cd(1)-O(3)     | 95.77(14)  |
| O(4)#1-Cd(1)-O(3)   | 124.02(14) | N(1)-Cd(1)-O(3)#1   | 91.69(15)  |
| N(3)-Cd(1)-O(3)#1   | 96.89(15)  | O(1)-Cd(1)-O(3)#1   | 168.39(14) |
| O(4)#1-Cd(1)-O(3)#1 | 53.16(13)  | O(3)-Cd(1)-O(3)#1   | 72.76(14)  |
| N(1)-Cd(1)-O(2)     | 89.44(17)  | N(3)-Cd(1)-O(2)     | 90.79(16)  |
| O(1)-Cd(1)-O(2)     | 53.52(15)  | O(4)#1-Cd(1)-O(2)   | 85.97(15)  |
| O(3)-Cd(1)-O(2)     | 149.28(14) | O(3)#1-Cd(1)-O(2)   | 137.96(14) |
| <b>Complex 3</b>    |            |                     |            |
| Cd(1)-O(2)#1        | 2.270(4)   | Cd(1)-O(2)          | 2.270(4)   |
| Cd(1)-O(5)#1        | 2.290(4)   | Cd(1)-O(5)          | 2.290(4)   |
| Cd(1)-O(4)          | 2.330(4)   | Cd(1)-O(4)#1        | 2.330(4)   |
| Cd(2)-O(3)          | 2.202(4)   | Cd(2)-O(1)          | 2.205(4)   |
| Cd(2)-O(6)          | 2.298(4)   | Cd(2)-N(2)          | 2.307(5)   |
| Cd(2)-N(1)          | 2.373(5)   | Cd(2)-O(5)#1        | 2.489(4)   |
| O(2)#1-Cd(1)-O(2)   | 180.0(2)   | O(2)#1-Cd(1)-O(5)#1 | 90.24(15)  |
| O(2)-Cd(1)-O(5)#1   | 89.76(15)  | O(2)#1-Cd(1)-O(5)   | 89.76(15)  |
| O(2)-Cd(1)-O(5)     | 90.24(15)  | O(5)#1-Cd(1)-O(5)   | 180.0      |
| O(2)#1-Cd(1)-O(4)   | 84.29(16)  | O(2)-Cd(1)-O(4)     | 95.71(16)  |
| O(5)#1-Cd(1)-O(4)   | 86.52(15)  | O(5)-Cd(1)-O(4)     | 93.48(15)  |
| O(2)#1-Cd(1)-O(4)#1 | 95.71(16)  | O(2)-Cd(1)-O(4)#1   | 84.29(16)  |
| O(5)#1-Cd(1)-O(4)#1 | 93.48(15)  | O(5)-Cd(1)-O(4)#1   | 86.52(15)  |
| O(4)-Cd(1)-O(4)#1   | 180.00(13) | O(3)-Cd(2)-O(1)     | 87.48(16)  |

---

|                   |            |                   |            |
|-------------------|------------|-------------------|------------|
| O(3)-Cd(2)-O(6)   | 95.37(16)  | O(1)-Cd(2)-O(6)   | 153.00(17) |
| O(3)-Cd(2)-N(2)   | 95.09(17)  | O(1)-Cd(2)-N(2)   | 105.94(18) |
| O(6)-Cd(2)-N(2)   | 100.55(17) | O(3)-Cd(2)-N(1)   | 163.49(18) |
| O(1)-Cd(2)-N(1)   | 87.92(18)  | O(6)-Cd(2)-N(1)   | 95.92(18)  |
| N(2)-Cd(2)-N(1)   | 71.01(18)  | O(3)-Cd(2)-O(5)#1 | 114.35(15) |
| O(1)-Cd(2)-O(5)#1 | 99.43(15)  | O(6)-Cd(2)-O(5)#1 | 55.02(14)  |
| N(2)-Cd(2)-O(5)#1 | 141.80(15) | N(1)-Cd(2)-O(5)#1 | 82.05(16)  |

**Complex 4**

|                     |            |                     |           |
|---------------------|------------|---------------------|-----------|
| Mn(1)-O(4)#1        | 2.175(2)   | Mn(1)-O(4)          | 2.175(2)  |
| Mn(1)-O(1)          | 2.198(2)   | Mn(1)-O(1)#1        | 2.198(2)  |
| Mn(1)-O(5)          | 2.202(2)   | Mn(1)-O(5)#1        | 2.202(2)  |
| Mn(2)-O(6)          | 2.073(2)   | Mn(2)-O(3)          | 2.074(2)  |
| Mn(2)-O(2)          | 2.200(2)   | Mn(2)-N(1)          | 2.226(3)  |
| Mn(2)-N(2)          | 2.293(3)   | Mn(2)-O(1)          | 2.352(2)  |
| O(4)#1-Mn(1)-O(4)   | 180.0      | O(4)#1-Mn(1)-O(1)   | 87.30(9)  |
| O(4)-Mn(1)-O(1)     | 92.70(9)   | O(4)#1-Mn(1)-O(1)#1 | 92.70(9)  |
| O(4)-Mn(1)-O(1)#1   | 87.30(9)   | O(1)-Mn(1)-O(1)#1   | 180.0     |
| O(4)#1-Mn(1)-O(5)   | 86.06(9)   | O(4)-Mn(1)-O(5)     | 93.94(9)  |
| O(1)-Mn(1)-O(5)     | 90.44(8)   | O(1)#1-Mn(1)-O(5)   | 89.56(8)  |
| O(4)#1-Mn(1)-O(5)#1 | 93.94(9)   | O(4)-Mn(1)-O(5)#1   | 86.06(9)  |
| O(1)-Mn(1)-O(5)#1   | 89.56(8)   | O(1)#1-Mn(1)-O(5)#1 | 90.44(8)  |
| O(5)-Mn(1)-O(5)#1   | 180.00(3)  | O(6)-Mn(2)-O(3)     | 89.45(10) |
| O(6)-Mn(2)-O(2)     | 157.22(9)  | O(3)-Mn(2)-O(2)     | 93.52(10) |
| O(6)-Mn(2)-N(1)     | 106.02(10) | O(3)-Mn(2)-N(1)     | 96.98(10) |
| O(2)-Mn(2)-N(1)     | 96.03(10)  | O(6)-Mn(2)-N(2)     | 88.12(11) |
| O(3)-Mn(2)-N(2)     | 168.77(10) | O(2)-Mn(2)-N(2)     | 92.96(10) |
| N(1)-Mn(2)-N(2)     | 73.20(10)  | O(6)-Mn(2)-O(1)     | 100.10(9) |
| O(3)-Mn(2)-O(1)     | 107.64(9)  | O(2)-Mn(2)-O(1)     | 57.52(8)  |
| N(1)-Mn(2)-O(1)     | 144.06(9)  | N(2)-Mn(2)-O(1)     | 83.58(9)  |
| Mn(1)-O(1)-Mn(2)    | 102.68(9)  |                     |           |

**Complex 5**

|                  |            |                  |            |
|------------------|------------|------------------|------------|
| Mn(1)-O(4)       | 2.107(3)   | Mn(1)-O(5)       | 2.109(3)   |
| Mn(1)-O(1)       | 2.146(3)   | Mn(1)-O(8)       | 2.200(3)   |
| Mn(1)-O(10)      | 2.267(3)   | Mn(1)-O(7)       | 2.374(3)   |
| Mn(2)-O(3)       | 2.091(3)   | Mn(2)-O(9)       | 2.131(3)   |
| Mn(2)-O(2)       | 2.138(3)   | Mn(2)-O(6)       | 2.186(3)   |
| Mn(2)-O(7)#1     | 2.241(3)   | Mn(2)-O(10)      | 2.328(3)   |
| O(4)-Mn(1)-O(5)  | 94.13(13)  | O(4)-Mn(1)-O(1)  | 175.82(13) |
| O(5)-Mn(1)-O(1)  | 90.05(13)  | O(4)-Mn(1)-O(8)  | 83.40(12)  |
| O(5)-Mn(1)-O(8)  | 165.05(12) | O(1)-Mn(1)-O(8)  | 92.58(13)  |
| O(4)-Mn(1)-O(10) | 93.45(12)  | O(5)-Mn(1)-O(10) | 94.87(11)  |
| O(1)-Mn(1)-O(10) | 86.11(12)  | O(8)-Mn(1)-O(10) | 99.99(12)  |
| O(4)-Mn(1)-O(7)  | 88.49(12)  | O(5)-Mn(1)-O(7)  | 108.12(11) |

---

---

|                   |            |                    |            |
|-------------------|------------|--------------------|------------|
| O(1)-Mn(1)-O(7)   | 90.28(12)  | O(8)-Mn(1)-O(7)    | 57.17(11)  |
| O(10)-Mn(1)-O(7)  | 156.73(11) | O(3)-Mn(2)-O(9)    | 85.31(13)  |
| O(3)-Mn(2)-O(2)   | 175.10(13) | O(9)-Mn(2)-O(2)    | 89.84(12)  |
| O(3)-Mn(2)-O(6)   | 97.80(13)  | O(9)-Mn(2)-O(6)    | 95.92(13)  |
| O(2)-Mn(2)-O(6)   | 83.41(11)  | O(3)-Mn(2)-O(7)#1  | 94.77(13)  |
| O(9)-Mn(2)-O(7)#1 | 89.75(13)  | O(2)-Mn(2)-O(7)#1  | 84.46(11)  |
| O(6)-Mn(2)-O(7)#1 | 166.59(12) | O(3)-Mn(2)-O(10)   | 97.40(12)  |
| O(9)-Mn(2)-O(10)  | 176.85(12) | O(2)-Mn(2)-O(10)   | 87.41(11)  |
| O(6)-Mn(2)-O(10)  | 85.30(12)  | O(7)#1-Mn(2)-O(10) | 88.44(11)  |
| Mn(1)-O(10)-Mn(2) | 104.95(12) | Mn(2)#2-O(7)-Mn(1) | 109.13(12) |

---

<sup>A</sup>Symmetry codes: complex **2**: #1 -x+1,-y+1,-z+1; complex **3**: #1 -x,-y,-z+1; complex **4**: #1 -x+1,-y,-z+2; complex **5**: #1 x,y+1,z; #2 x,y-1,z.
